# Supplementary material
Source: publisher figshare collection journal article supplement (https://tandf.figshare.com/ndownloader/files/20707221)
Supplement: Supplementary file 1 [file 20707221]

**Supplemental Figure 1**

Qualitative analysis of raffinose by HPLC-MS. Raffinose was detected as potassium salt of raffinose with a mass of 543.13 m/z in ESI MS in positive polarity.

**Supplemental Figure 2**

Comparative graph showing concentration of reducing sugars, sucrose, and α-galactosides during various stages of chickpea seed maturation and germination. The sugars are expressed as milligram per gram of seed powder.
